# Supplementary material for: Soft Wearable Piezoresistive Sensors Based on Natural Rubber Fabricated with a Customized Vat-Based Additive Manufacturing Process
Source: MDPI journal article supplement (doi:10.3390/polym15102410), 2023-05-22
Supplement: s1 [file s1]

## Supplementary Figures

### Dynamic testing 0-10%

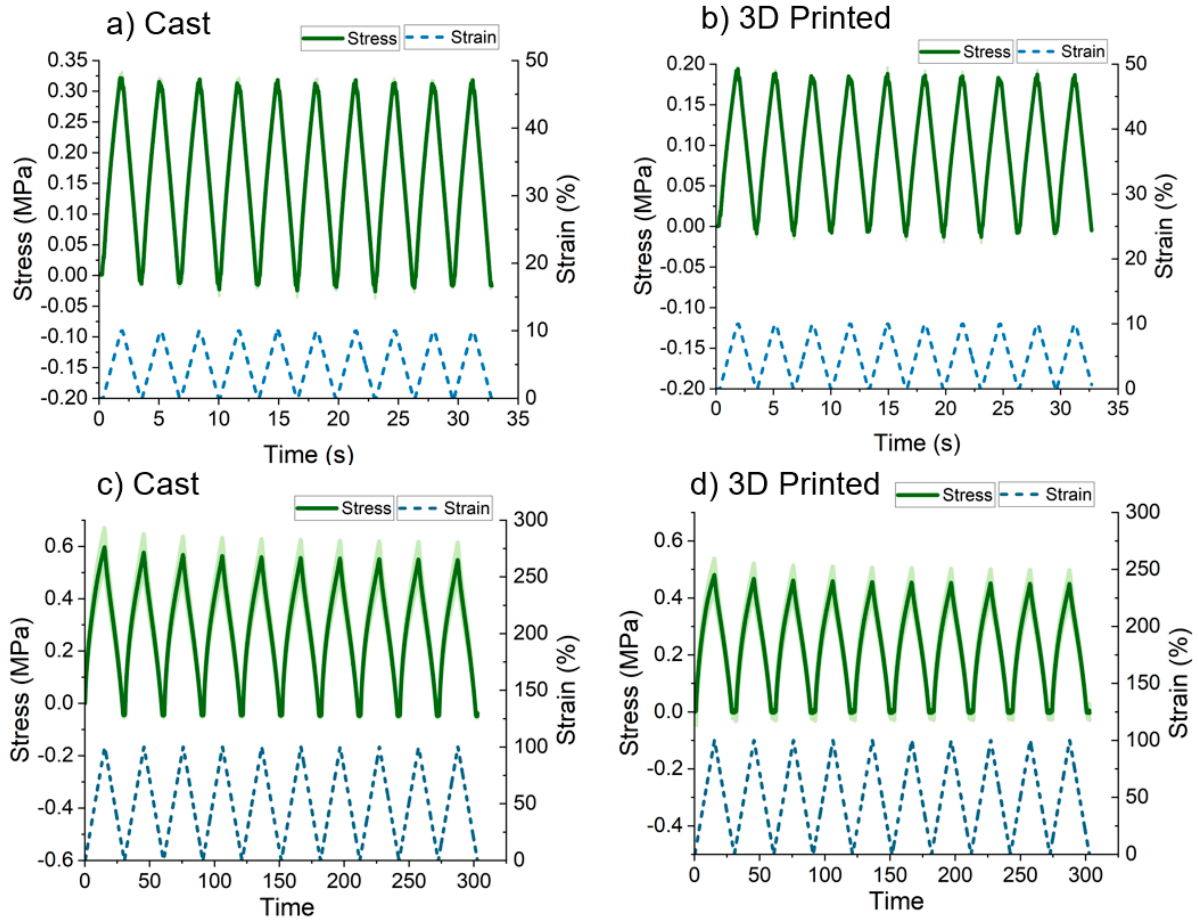

**Figure S1:** Response of the mechanical stress during the tensile testing for the cast and 3D printed samples in a range of strains a)-b) 0-10% and c)-d) 0-100%.

## Dynamic testing 50-60%

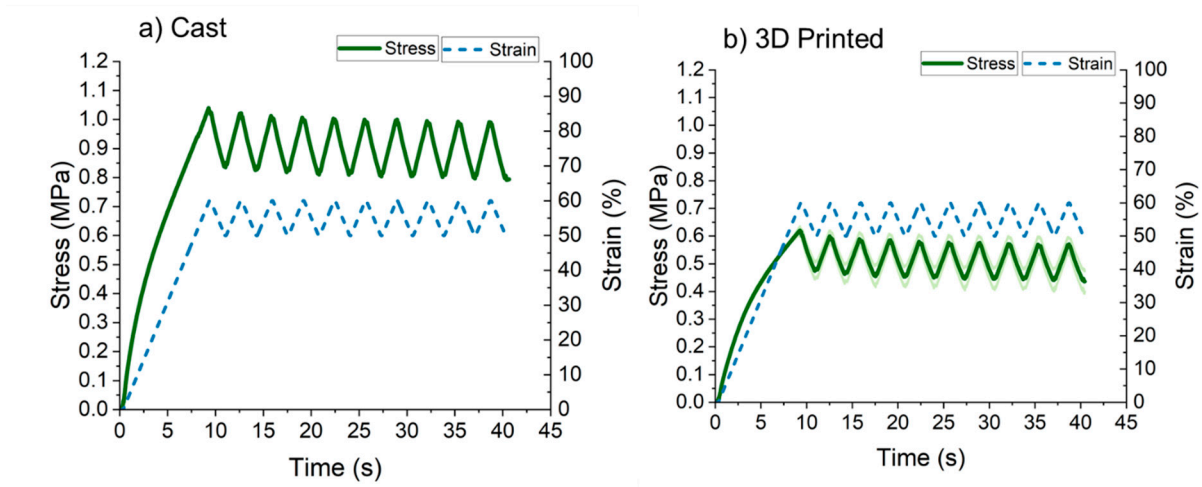

**Figure S2:** Response of the mechanical stress during the tensile testing for a) the cast and b) 3D printed samples in a range of strains 50-60%.

### Dynamic testing 0-50%

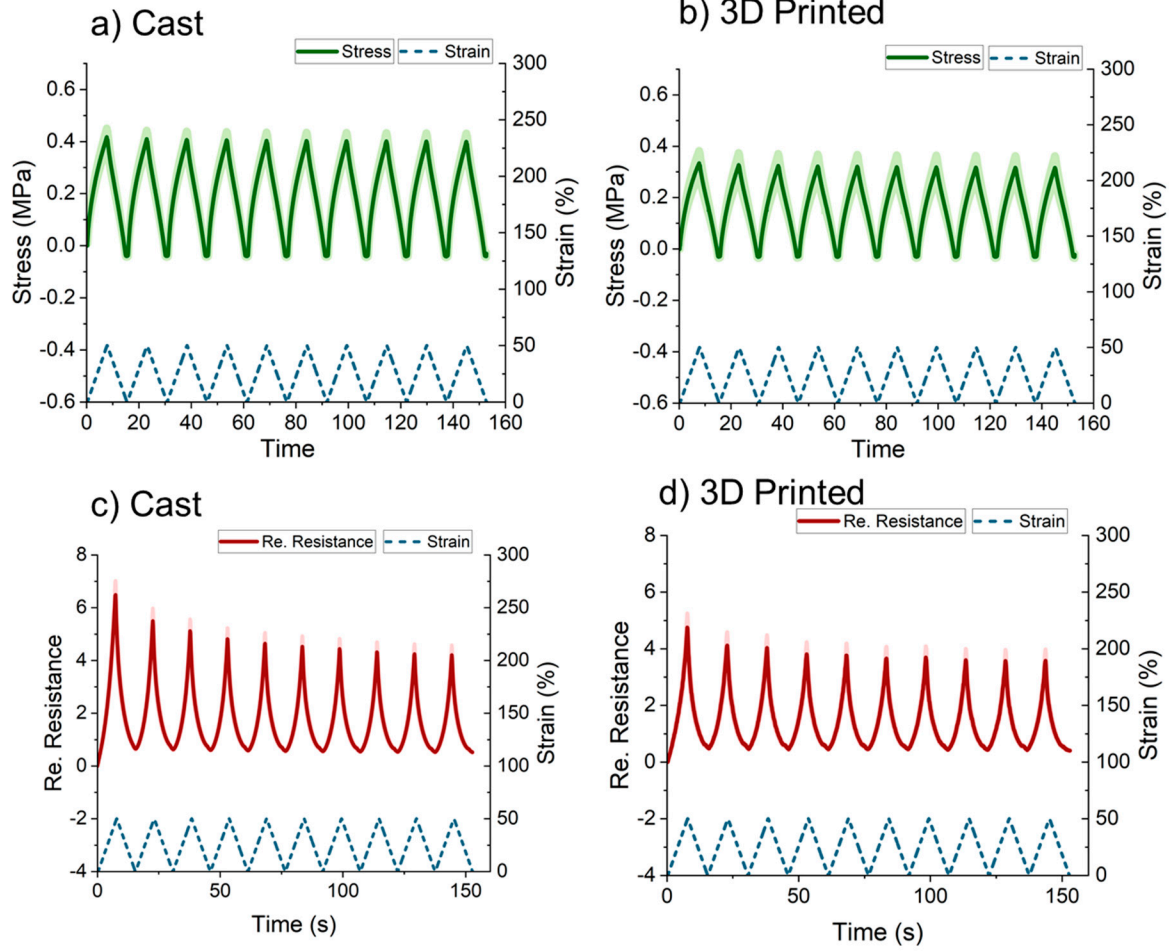

**Figure S3:** Response of the mechanical stress during the tensile testing for a) the cast and b) 3D printed samples in a range of strains 0-50%. Response of the relative resistance during the tensile testing for c) the cast and d) 3D printed samples in a range of strains 0-50%.
